# Supplementary material
Source: MDPI journal article supplement (https://www.mdpi.com/2072-4292/11/17/1999)
Supplement: s1 [file s1]

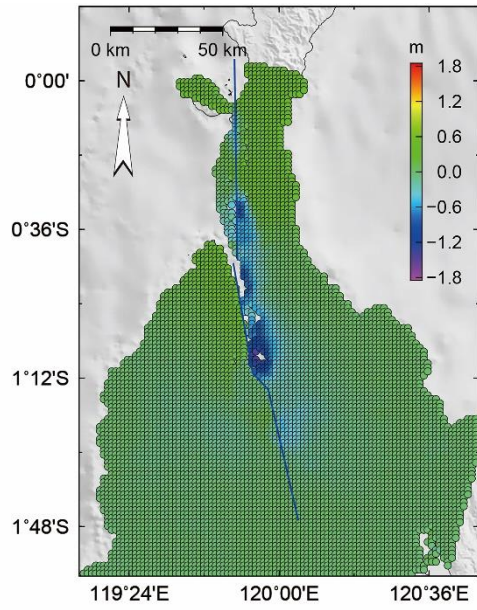

**Figure S1.** Downsampled line-of-sight (LOS) deformation observations.

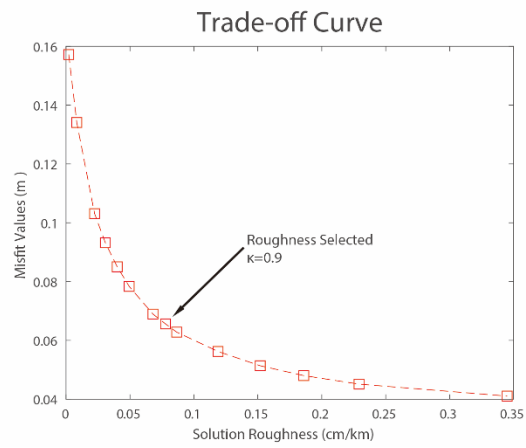

**Figure S2.** Trade-off curve between misfit and solution roughness.

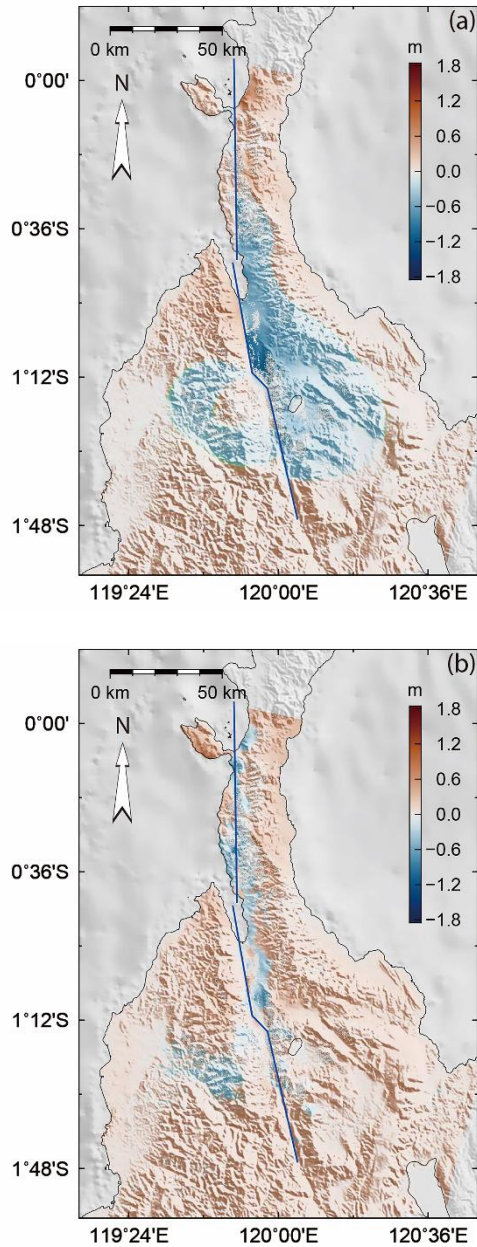

**Figure S3.** (a) Synthetic line-of-sight (LOS) deformation based on the source mechanism variation model. (b) Residual LOS deformation between the observed and synthetic deformation.

**Table S1.** The source parameters of the 2005 M 6.3 and the 2012 M 6.3 earthquakes constructed.

| Parameters                | The 23 January 2005 | The 18 August 2012 |
|---------------------------|---------------------|--------------------|
| Top Central Latitude (°)  | -1.239              | -1.326             |
| Top Central Longitude (°) | 119.900             | 120.092            |
| Top depth (km)            | 0                   | 0                  |
| Length (km)               | 10                  | 10                 |
| Width (km)                | 20                  | 20                 |
| Strike (°)                | 321                 | 339                |
| Dip (°)                   | 61                  | 84                 |
| Rake (°)                  | -59                 | -4                 |
| Net slip (m)              | 0.473               | 0.609              |
